# Supplementary material
Source: Springer Nature journal article supplement (https://www.springermedizin.de/resource/supplementary/13685_2013_27_MOESM3_ESM.pdf/9681254)

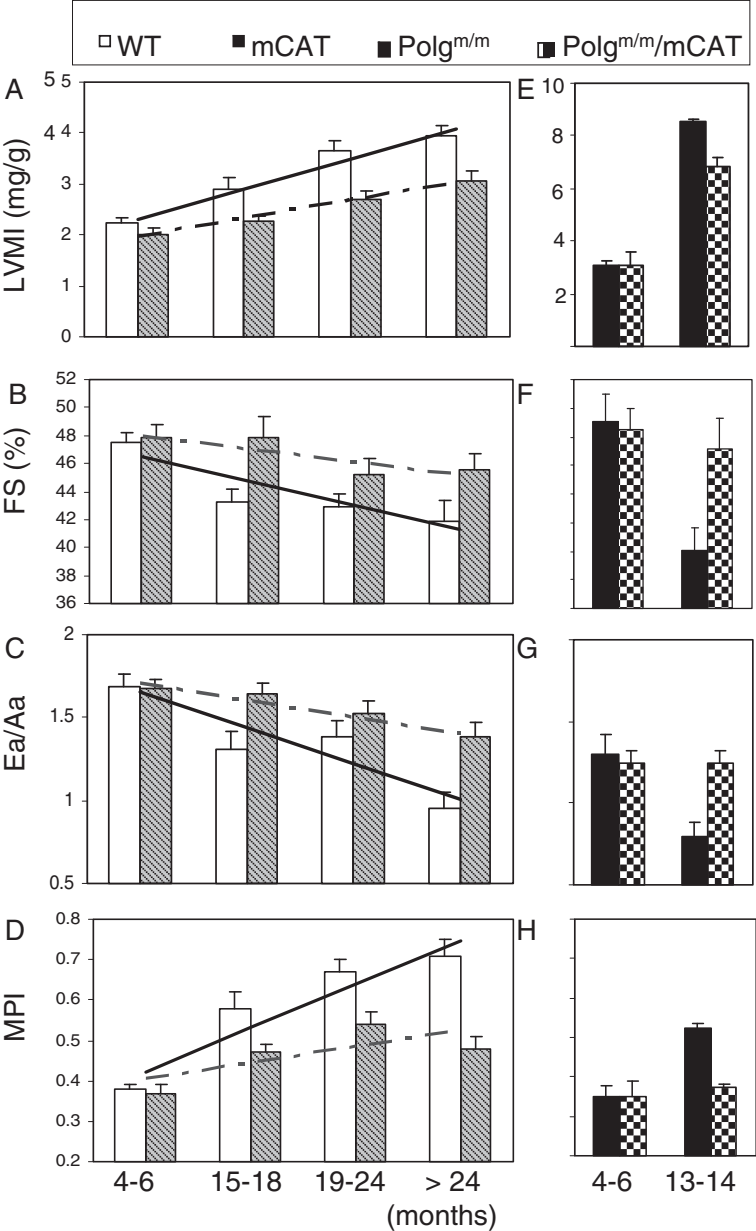

Supplement: MOESM3 [file 9681254]
